# Supplementary material for: Role of hsa-miR-105 during the pathogenesis of paclitaxel resistance and its clinical implication in ovarian cancer
Source: PubMed Central journal article supplement — Oncol Rep. 2021 Mar 31;45(5):84. doi: 10.3892/or.2021.8035 (PMC8025119; doi:10.3892/or.2021.8035), 2021-03-31
Supplement: Supplementary_Data.pdf [file Supplementary_Data.pdf]

Figure S1. Inhibition of hsa-miR-105 attenuates chemosensitivity to paclitaxel (PTX) in OVCAR8 cells. (A) OVCAR8 cells were transfected with 100 nM hsa-miR-105 inhibitors (anti-miR-150) or control (Ctrl) using Lipofectamine™ 3000. Following 48 h, the cells were harvested and RT-qPCR analysis was carried out to determine the hsa-miR-105 levels. (B) Forty-eight hours after transfection with the indicated oligonucleotides, OVCAR8 cells were seeded in 96-well plates at the density of  $5 \times 10^3$  cells/well. Cells were then exposed to different doses of PTX as indicated or DMSO for 24 h, followed by measurement of cell viability using Cell Counting Kit-8 (\* $P < 0.05$ , \*\* $P < 0.01$ ). (C) Anchorage-dependent clonogenic ability of OVCAR8 cells with different transfections was assessed using colony formation assay (\* $P < 0.05$ ). (D) Effects of hsa-miR-105 inhibition on cell invasiveness were evaluated using a Transwell assay, as described in Materials and methods (\* $P < 0.05$ ). Scale bar, 10  $\mu\text{m}$ .

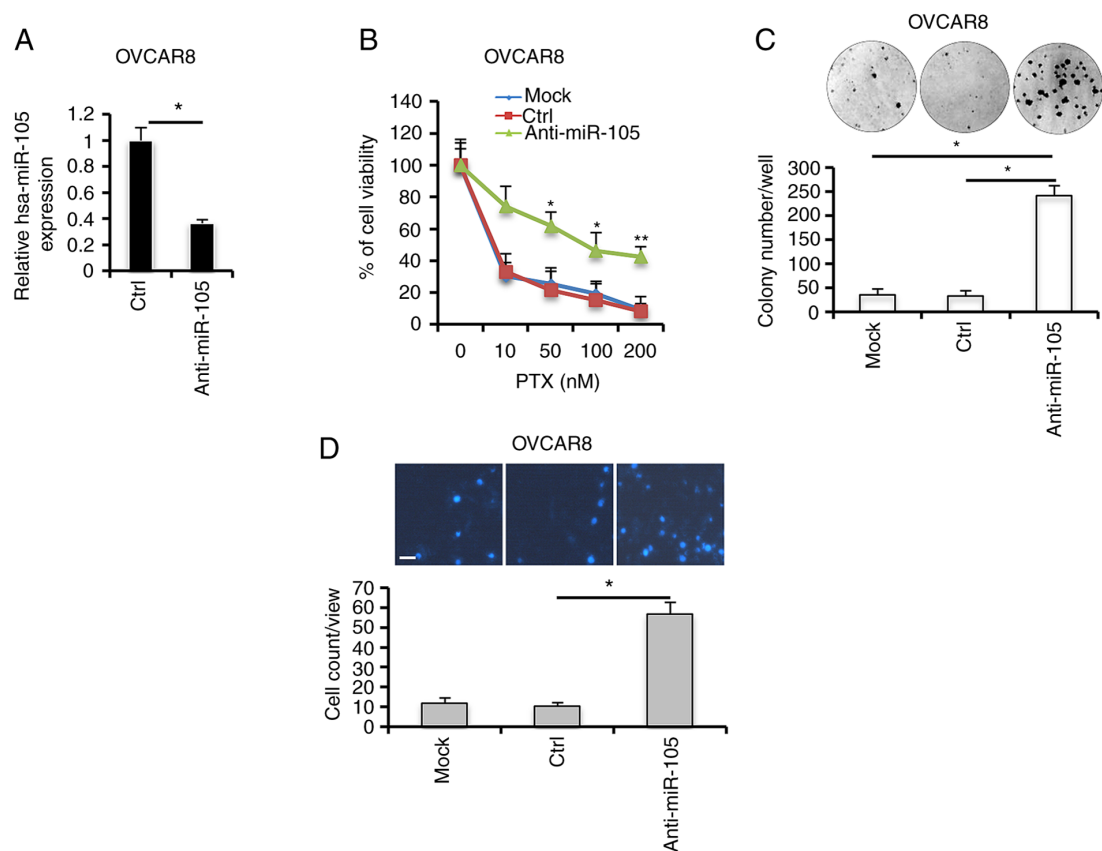

Figure S2. Inhibition of hsa-miR-105 attenuates chemosensitivity to both cisplatin and paclitaxel (PTX) in SKOV3 and OVCAR8 cells. (A) SKOV3 and OVCAR8 cells were transfected with 100 nM hsa-miR-105 inhibitors (anti-miR-105) or negative control using Lipofectamine™ 3000. Following 48 h, the cells were harvested and RT-qPCR analysis was carried out to determine the hsa-miR-105 levels. (B) Forty-eight hours after transfection with the indicated oligonucleotides, SKOV3 and OVCAR8 cells were seeded in 96-well plates at the density of  $5 \times 10^3$  cells/well. Cells were then exposed to 20 nM of PTX and 3.5  $\mu$ M of cisplatin or DMSO for different durations as indicated, followed by measurement of cell viability using Cell Counting Kit-8 (\* $P < 0.05$ ).

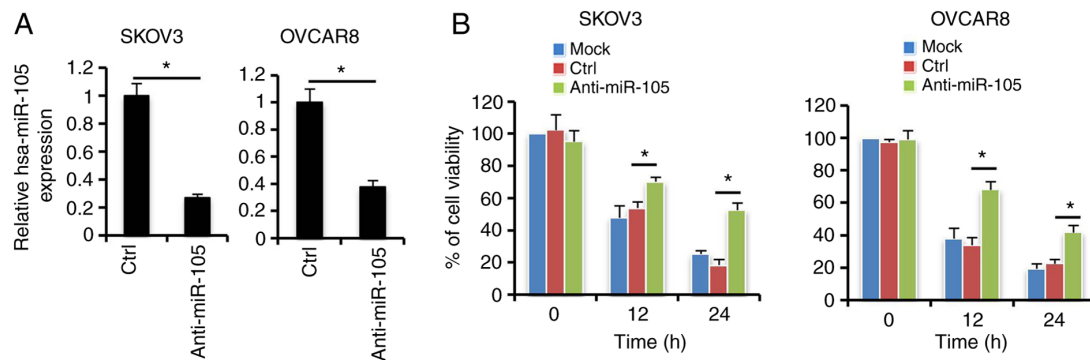

Table SI. Association between hsa-miR-105 expression and clinicopathological parameters of the female patients with ovarian cancer.

| Clinicopathological features | Cases (n) | hsa-miR-105 expression |            | P-value             |
|------------------------------|-----------|------------------------|------------|---------------------|
|                              |           | High (n=53)            | Low (n=62) |                     |
| Age (years)                  |           |                        |            | 0.5800              |
| <50                          | 32        | 13                     | 19         |                     |
| ≥50                          | 83        | 40                     | 43         |                     |
| FIGO stage                   |           |                        |            | 0.6700              |
| I/II                         | 38        | 17                     | 21         |                     |
| III/VI                       | 77        | 36                     | 41         |                     |
| Tumor grade                  |           |                        |            | 0.2300              |
| High-grade                   | 25        | 9                      | 16         |                     |
| Low-grade                    | 90        | 44                     | 46         |                     |
| Ascitic fluid volume (ml)    |           |                        |            | 0.4900              |
| <500                         | 31        | 11                     | 20         |                     |
| ≥500                         | 84        | 42                     | 42         |                     |
| Primary surgery (≤1 cm)      |           |                        |            | 0.6200              |
| Optimal                      | 77        | 36                     | 41         |                     |
| Suboptimal                   | 38        | 17                     | 21         |                     |
| Serum CA125 (U/ml)           |           |                        |            | 0.1600              |
| <1,000                       |           | 24                     | 36         |                     |
| ≥1,000                       |           | 29                     | 26         |                     |
| PTX chemosensitivity         |           |                        |            | 0.0042 <sup>a</sup> |
| Responsive                   | 56        | 43                     | 13         |                     |
| Resistant                    | 59        | 10                     | 49         |                     |
| Gross classification         |           |                        |            | 0.4170              |
| Mucinous                     | 16        | 9                      | 7          |                     |
| Serous                       | 78        | 58                     | 20         |                     |
| Endometrioid                 | 14        | 9                      | 5          |                     |
| Clear cell                   | 7         | 3                      | 4          |                     |

<sup>a</sup>Significant difference. FIGO, International Federation of Gynecology and Obstetrics; CA125, cancer antigen 125; PTX, paclitaxel.
